# Supplementary material
Source: publisher figshare collection journal article supplement (https://gsapubs.figshare.com/articles/dataset/_/12456344)
Supplement: Supplementary file 1 [file 1]

## Sheet: Table S2
TABLE S2. ZINC AND IRON ISOTOPE DATA IN LITERATURE
N°S	Rock	Locality	δ66Zn	±2SD	δ56Fe	±2SD
Xia et al 2017 : Volcanic rocks
FK10–98	Basaltictrachyandesites	Haillar Basin, China	0.3	0.03	0.18	0.03
FK10–99	Basaltictrachyandesites	Haillar Basin, China	0.3	0.06	0.09	0.04
FK10–96	Basaltictrachyandesites	Haillar Basin, China	0.21	0	0.24	0.02
FK10–97	Basaltictrachyandesites	Haillar Basin, China	0.27	0.03	0.08	0.02
FK10–100	Basaltictrachyandesites	Haillar Basin, China	0.28	0.02	0.07	0.05
FK10–101	Basaltictrachyandesites	Haillar Basin, China	0.3	0.03	0.05	0.02
FK10–78	Basaltictrachyandesites	Haillar Basin, China	0.27	0.02	0.05	0.05
FK10–79	Basaltictrachyandesites	Haillar Basin, China	0.26	0.03	0.18	0.06
FK10–77	Basaltictrachyandesites	Haillar Basin, China	0.29	0.03	0.05	0.03
FK10–116	Basaltictrachyandesites	Haillar Basin, China	0.26	0.05	0	0.02
FK10–111	Basaltictrachyandesites	Haillar Basin, China	0.24	0.03	0.15	0.03
FK10–112	Basaltictrachyandesites	Haillar Basin, China	0.25	0.01	0.04	0.05
FK10–113	Basaltictrachyandesites	Haillar Basin, China	0.31	0.01	0.02	0.04
FK10–80	Trachytes–rhyodacites	Haillar Basin, China	0.32	0.04	0.11	0.01
FK10–81	Trachytes–rhyodacites	Haillar Basin, China	0.36	0.02	0.36	0.03
FK10–102	Trachytes–rhyodacites	Haillar Basin, China	0.24	0.03	0.06	0.05
FK10–104	Trachytes–rhyodacites	Haillar Basin, China	0.48	0.02	0.33	0.03
FK10–105	Trachytes–rhyodacites	Haillar Basin, China	0.33	0.03	0.41	0.04
FK10–107	Trachytes–rhyodacites	Haillar Basin, China	0.23	0.02	0.21	0.02
FK10–108	Trachytes–rhyodacites	Haillar Basin, China	0.34	0.13	0.16	0.03
FK10–83	Rhyolites	Haillar Basin, China	0.29	0.02	0.64	0.02
FK10–87	Rhyolites	Haillar Basin, China	0.46	0.05	0.2	0.03
FK10–86	Rhyolites	Haillar Basin, China	0.26	0.01	0.24	0.03
FK10–88	Rhyolites	Haillar Basin, China	0.26	0.04	0.47	0.04
FK10–89	Rhyolites	Haillar Basin, China	0.29	0.01	0.4	0.04
FK10–90	Rhyolites	Haillar Basin, China	0.27	0.02	0.37	0.02
FK10–91	Rhyolites	Haillar Basin, China	0.34	0.01	0.26	0.05
FK10–84	Rhyolites	Haillar Basin, China			0.5	0.05
FK10–85	Rhyolites	Haillar Basin, China	0.27	0.01	0.47	0.03
McCoy-West et al 2018 : Baffin Island picrites
PI-22	Picrites	Padloping island, Baffin Island	0.269	0.017	0.06	0.069
PI-24	Picrites	Padloping island, Baffin Island	0.262	0.017	0.046	0.065
PI-25	Picrites	Padloping island, Baffin Island	0.191	0.017	-0.017	0.086
PI-26	Picrites	Padloping island, Baffin Island	0.262	0.021	0.076	0.058
PI-27	Picrites	Padloping island, Baffin Island	0.274	0.022	0.069	0.082
PI-27 (2)	Picrites	Padloping island, Baffin Island	0.237	0.042	0.098	0.049
PI-27 Av.	Picrites	Padloping island, Baffin Island	0.261	0.047	0.078	0.077
PI-28	Picrites	Padloping island, Baffin Island	0.21	0.02	0.053	0.071
PI-37	Picrites	Padloping island, Baffin Island	0.181	0.014	-0.025	0.036
PI-40	Picrites	Padloping island, Baffin Island	0.203	0.023	0.023	0.03
PI-40 (2)	Picrites	Padloping island, Baffin Island	0.205	0.02	0.013	0.034
PI-40 Av.	Picrites	Padloping island, Baffin Island	0.204	0.021	0.018	0.032
PI-43	Picrites	Padloping island, Baffin Island	0.231	0.013	0.043	0.056
PAD-6	Picrites	Padloping island, Baffin Island	0.231	0.028	0.065	0.034
DI-22	Picrites	Durban island, Baffin Island	0.236	0.017	0.035	0.044
DI-23	Picrites	Durban island, Baffin Island	0.192	0.02	-0.005	0.058
DI-24	Picrites	Durban island, Baffin Island	0.222	0.013	0.05	0.059
DI-26	Picrites	Durban island, Baffin Island	0.235	0.018	0.07	0.04
DI-27	Picrites	Durban island, Baffin Island	0.283	0.008	0.125	0.071
DUR-8	Picrites	Durban island, Baffin Island	0.209	0.052	0.029	0.016
CS-7	Picrites	Cape Searle, Baffin Island	0.231	0.03	0.073	0.046
Telus et al 2012: Plutonic rocks
I1	I-type	Tuross Head	0.247	0.09	0.123	0.02
I2	I-type	Yurammie	0.192	0.09	0.081	0.021
I4	I-type	Wallagaraugh	0.266	0.09	0.193	0.021
I6	I-type	Clear Hills	0.171	0.09	0.064	0.021
I7	I-type	Eugowra	0.119	0.09	0.121	0.022
I8	I-type	Lusterfield	0.179	0.09	0.125	0.02
S1	S-type	Cooma	0.13	0.09	0.099	0.022
S2	S-type	Cowra	0.122	0.09	0.097	0.02
S3	S-type	Jillamatong	0.33	0.09	0.114	0.02
S4	S-type	Minnegans	0.224	0.09	0.155	0.033
S5	S-type	Dalgety	0.325	0.09	0.113	0.02
S6	S-type	Numbla	0.209	0.09	0.139	0.021
S7	S-type	Koetong	0.357	0.09	0.112	0.022
S8	S-type	Strathbogie	0.355	0.09	0.152	0.02
S9	S-type	Hawkins	0.303	0.09	0.072	0.021
HP49-A	Granite	Black Hills	0.486	0.09	0.161	0.052
HP21-C	Granite	Black Hills	0.342	0.09	0.24	0.041
A1	A-type	Watergums	0.269	0.09	0.148	0.022
A2	A-type	Mumbella	0.233	0.09	0.305	0.022
81BH5-1	Pegmatites	Black Hills	0.673	0.09	0.27	0.054
81BH9-2	Pegmatites	Black Hills	0.875	0.09	0.197	0.054
81BH10-3	Pegmatites	Black Hills	0.752	0.09	0.221	0.054
82BH43-1	Pegmatites	Black Hills	0.631	0.09	0.385	0.054
WC-9	Pegmatites	Black Hills	0.534	0.09	0.209	0.054
Inglis et al 2017: Metamorphic rocks (subducted related)	Picrites
PR4	Greenschist facies metagabbro	Chenaillet, Alpes	0.2	0.04	0.11	0.04
CE7	Blueschist facies metagabbros	Queyras, Alpes	0.16	0.04	0.07	0.03
CE12	Blueschist facies metagabbros	Queyras, Alpes	0.24	0.03	0.16	0.04
QE1	Blueschist facies metagabbros	Queyras, Alpes	0.12	0.04	0	0.06
QE10	Blueschist facies metagabbros	Queyras, Alpes	0.16	0.02	0.02	0.03
RV7	Blueschist facies metagabbros	Queyras, Alpes	0.03	0.02	0.14	0.05
TR6	Blueschist facies metagabbros	Queyras, Alpes	0.25	0.03	0.14	0.04
TR9	Blueschist facies metagabbros	Queyras, Alpes	0.15	0.03	0.13	0.05
BB1	Blueschist facies metagabbros	Queyras, Alpes	0.26	0.03	0.07	0.05
CE8A	Metasomatic contact	Queyras, Alpes	0.03	0.02	-0.02	0.03
RV5	Metasediments	Queyras, Alpes	0.13	0.02	0.09	0.03
CP1	Metasediments	Queyras, Alpes	0	0.02	0.05	0.04
S01/5G	Allalin gabbros	Zermatt, Alpes	0.22	0.03	0.14	0.06
S02/83viiixG	Allalin gabbros	Zermatt, Alpes	0.23	0.02	0.3	0.06
S02/75iiR	basaltic eclogites	Zermatt, Alpes	0.3	0.02	0.16	0.04
S02/75iiiC	Basaltic eclogites	Zermatt, Alpes	0.26	0.03	0.11	0.03
S02/75iiiR	Basaltic eclogites	Zermatt, Alpes	0.21	0.02	0.08	0.01
S02/41ii	Basaltic eclogites	Zermatt, Alpes	0.26	0.03	0.05	0.07
S02/41v	Basaltic eclogites	Zermatt, Alpes	0.33	0.03	0.18	0.02
S01/35iiix	Gabbroic eclogites	Zermatt, Alpes	0.28	0.05	0.08	0.03
S01/40viix	Gabbroic eclogites	Zermatt, Alpes	0.24	0.06	0.03	0.04
S02/85ixE	Gabbroic eclogites	Zermatt, Alpes	0.28	0.02	0.22	0.05
S02/85ixB	Gabbroic eclogites	Zermatt, Alpes	0.24	0.02	0.29	0.04
S01/40vx	Gabbroic eclogites	Zermatt, Alpes	0.05	0.03	0.16	0.05
Debret et al 2018: Metamorphic rocks (subducted related)
CP2	Qeyras complex	Queyras, Alpes	0.19	0.03	0.12	0.04
CP8	Qeyras complex	Queyras, Alpes	0.22	0.01	0.01	0.01
CE14B	Qeyras complex	Queyras, Alpes	-0.56	0.02	-0.27	0.07
CE10	Qeyras complex	Queyras, Alpes	0.22	0.01	-0.03	0.11
CE3	Qeyras complex	Queyras, Alpes	0.17	0.01	0.01	0.06
RV3	Qeyras complex	Queyras, Alpes	0.23	0.02	-0.17	0.06
RV8	Qeyras complex	Queyras, Alpes	0.21	0.02	-0.07	0.06

## Sheet: G47647
Doucet, L.S., et al., 2020, Archean lithospheric differentiation: Insights from Fe and Zn isotopes: Geology, v. 48, https://doi.org/10.1130/G47647.1
